# Supplementary material
Source: PubMed Central journal article supplement (PMC6266856)
Supplement: NIHMS974118-supplement.pdf [file NIHMS974118-supplement.pdf]

**Supplement Table 1: Multivariate analysis of visual acuity and OCT parameters at final visit, controlling for presence of CME.**

|                               | <b>VA at Final Visit</b> |                |               |
|-------------------------------|--------------------------|----------------|---------------|
| OCT Parameter                 | Parameter Estimate       | Standard Error | P Value       |
| Central Subfield Thickness    | 0.6721                   | 0.3924         | 0.1088        |
| Subfoveal Choroidal Thickness | 0.0251                   | 0.3211         | 0.9388        |
| Extent of DRIL                | 0.1645                   | 0.064          | <b>0.0236</b> |
| Extent of ELM Disruption      | 0.974                    | 0.969          | 0.3319        |
| Extent of EZ Disruption       | -0.742                   | 0.9708         | 0.4574        |
